# Supplementary material for: Automated refinement of macromolecular structures at low resolution using prior information
Source: PubMed Central journal article supplement (PMC5053141; doi:10.1107/s2059798316014534), 2016-09-30
Supplement: d-72-01149-sup1.pdf [file d-72-01149-sup1.pdf]

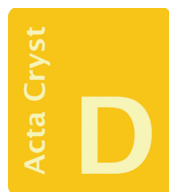

STRUCTURAL  
BIOLOGY

**Volume 72 (2016)**

**Supporting information for article:**

**Automated refinement of macromolecular structures at low resolution using prior information**

**Oleg Kovalevskiy, Robert A. Nicholls and Garib N. Murshudov**

**Figure S1** Supporting information Scatterplots show performance of the LORESTR Q-score ranking on several random test cases; the numeric observation labels indicate the Q-score rank for a particular protocol that resulted in the corresponding  $R_{\text{free}}$  value and MolProbity percentile score.

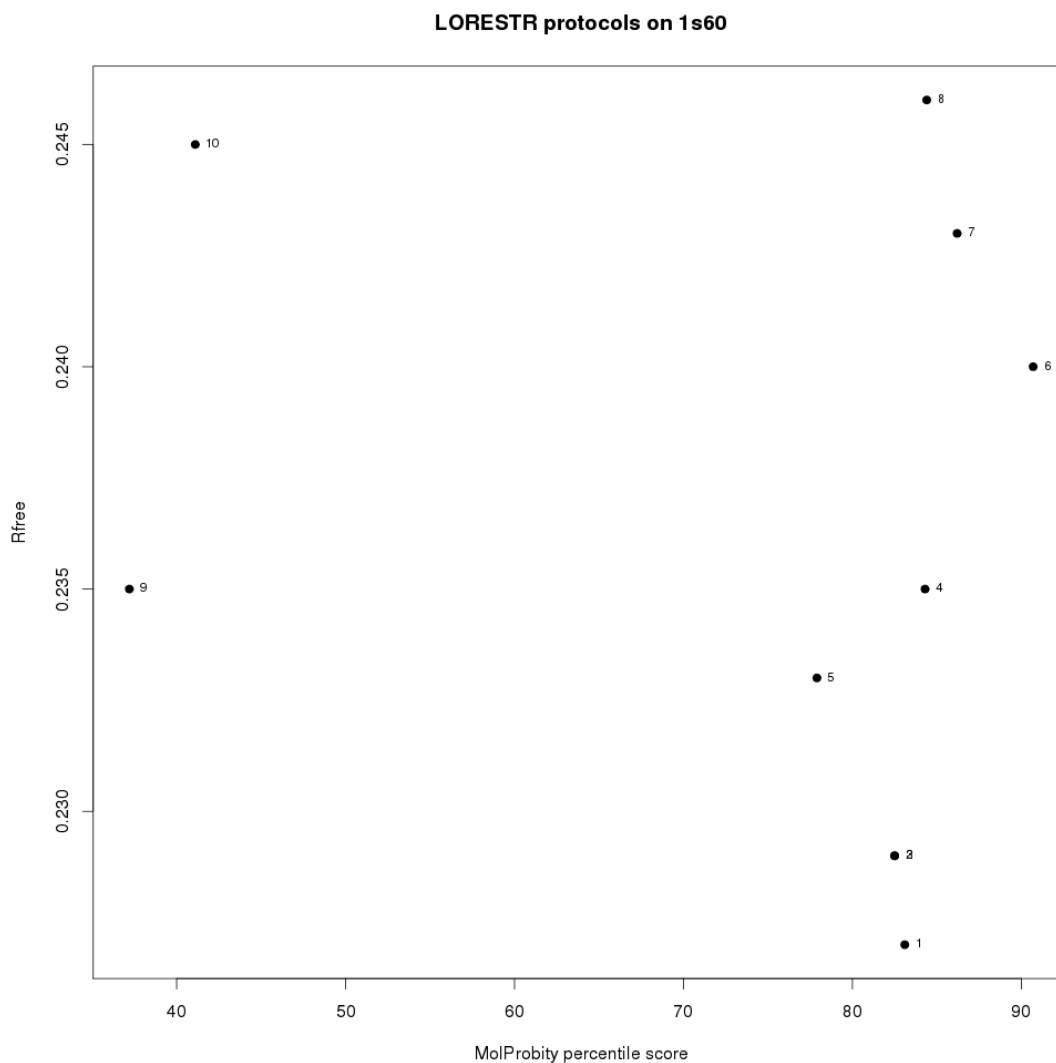

## LORESTR protocols on 2zo2

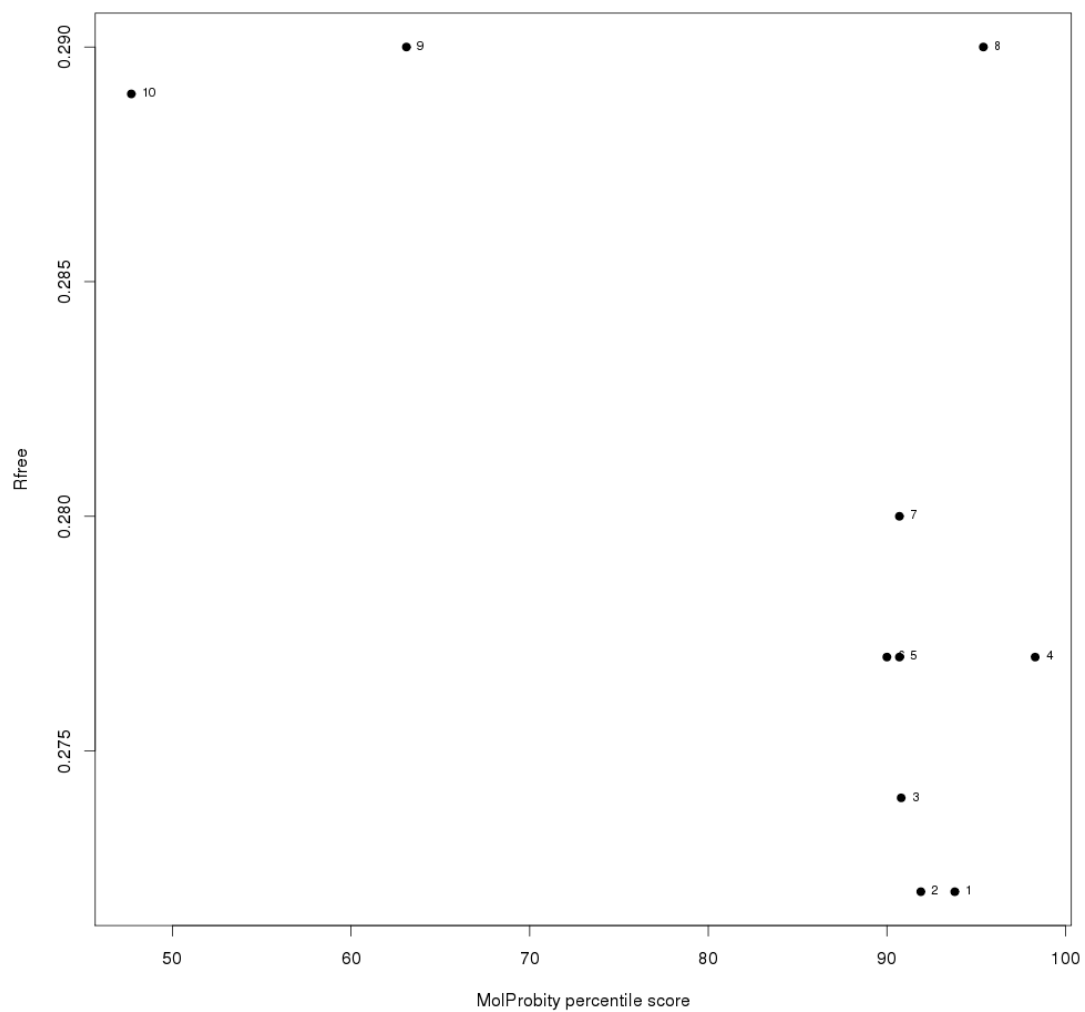

## LORESTR protocols on 2dr2

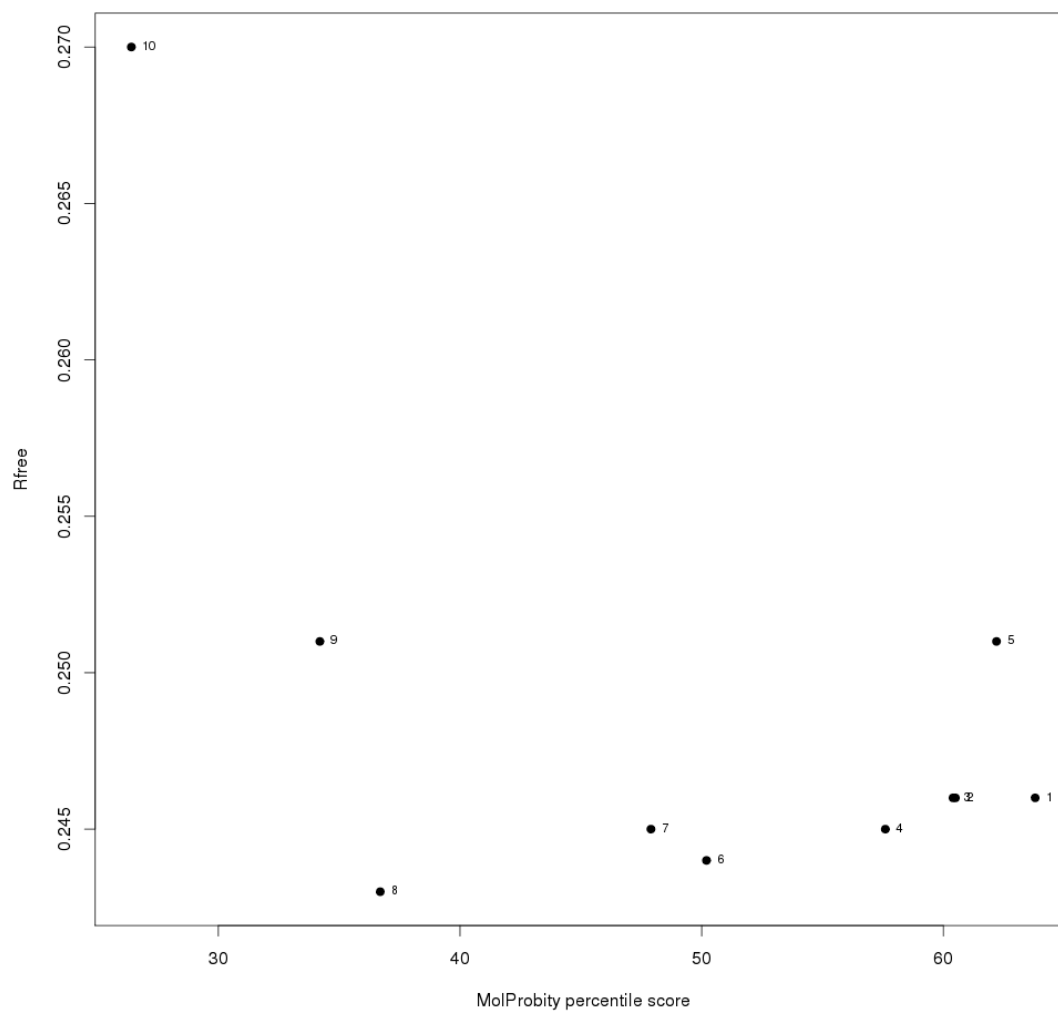

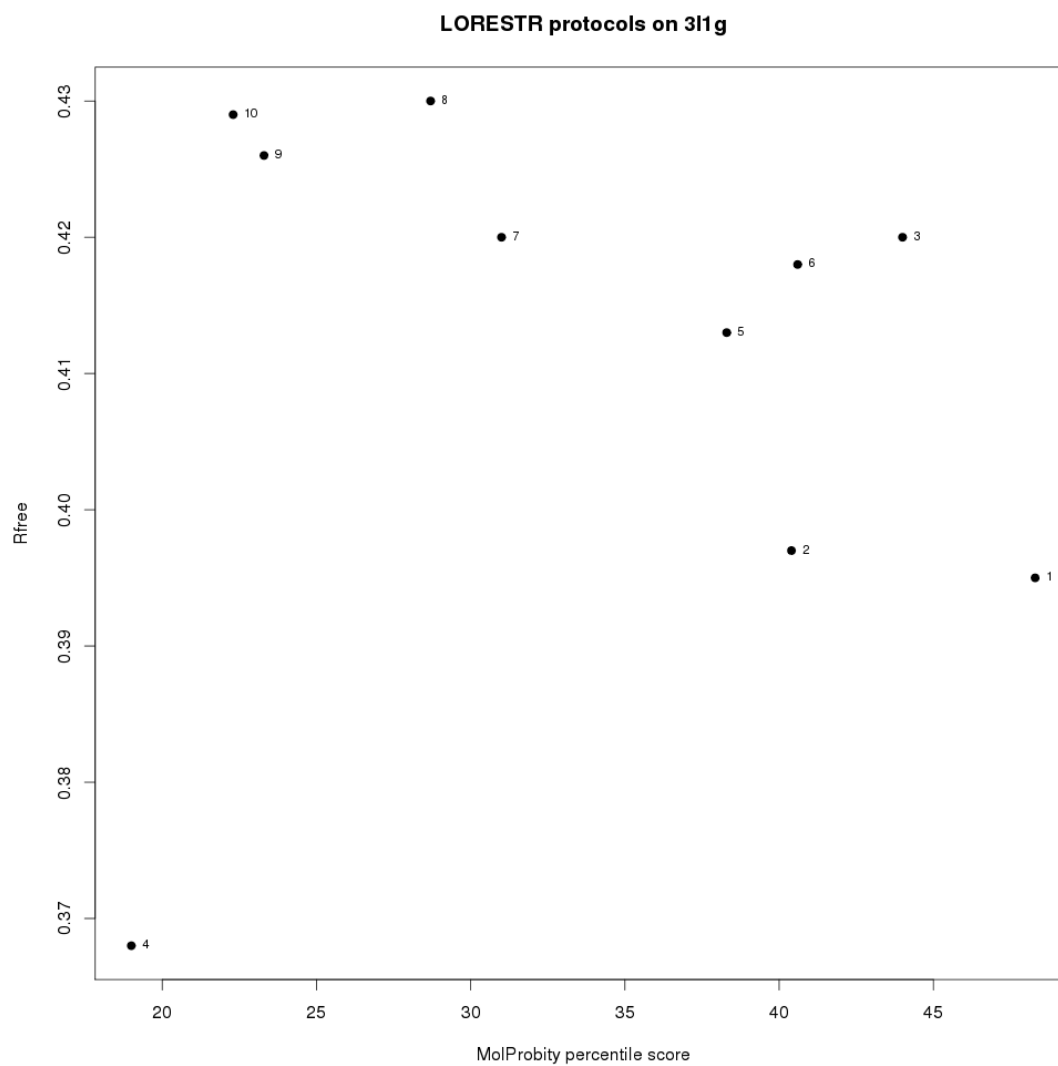

**Table S1** Details of the test sets

Subset 1: more than two homologues, used for refinement with multiple homologues

Subset 2: have homologues with 75%-90% sequence identity

Subset 3: cases where multiple homologues performed better or equal to a single homologue

Subset 4: cases where multiple homologues performed worse than a single homologue

| PDB code | Reported resolution | Resolution of the data | Subset 1 | Subset 2 | Subset 3 | Subset 4 | Number of homologues | High-resolution homologues (PDB code, resolution, sequence identity, RMSD)                                                                                                                                                                                                                                                                          |
|----------|---------------------|------------------------|----------|----------|----------|----------|----------------------|-----------------------------------------------------------------------------------------------------------------------------------------------------------------------------------------------------------------------------------------------------------------------------------------------------------------------------------------------------|
| 2rgr     | 3.0                 | 3.0                    | X        |          |          |          | 3                    | 3l4j (2.5 A, 99.7%, 2.79 A), 1bjt (2.5 A, 100.0%, 15.90 A), 1bgw (2.7 A, 100.0%, 15.20 A),                                                                                                                                                                                                                                                          |
| 2is2     | 3.0                 | 3.0                    | X        |          | X        |          | 3                    | 3lfu (1.8 A, 99.8%, 14.50 A), 2is6 (2.2 A, 100.0%, 3.01 A), 2is1 (2.9 A, 100.0%, 1.22 A),                                                                                                                                                                                                                                                           |
| 1ob5     | 3.1                 | 3.0                    | X        |          |          |          | 7                    | 2c78 (1.4 A, 98.0%, 4.41 A), 2c77 (1.6 A, 97.8%, 4.01 A), 1exm (1.7 A, 97.5%, 2.34 A), 1ha3 (2.0 A, 97.4%, 1.35 A), 1b23 (2.6 A, 100.0%, 2.58 A), 1ttt (2.7 A, 100.0%, 2.54 A), 1tui (2.7 A, 100.0%, 11.10 A),                                                                                                                                      |
| 2c9m     | 3.0                 | 3.0                    | X        |          |          | X        | 11                   | 3ar7 (2.1 A, 100.0%, 15.40 A), 3n5k (2.2 A, 100.0%, 15.50 A), 1wpg (2.3 A, 100.0%, 15.30 A), 2agv (2.4 A, 100.0%, 15.40 A), 2zbf (2.4 A, 100.0%, 14.30 A), 2zbd (2.4 A, 100.0%, 13.90 A), 1su4 (2.4 A, 100.0%, 4.61 A), 3fpb (2.5 A, 100.0%, 15.40 A), 3b9b (2.6 A, 100.0%, 14.10 A), 1vfp (2.9 A, 100.0%, 14.00 A), 2eat (2.9 A, 100.0%, 15.50 A), |
| 3b9r     | 3.0                 | 3.0                    | X        |          |          | X        | 11                   | 3ar7 (2.1 A, 100.0%, 4.41 A), 3n5k (2.2 A, 100.0%, 1.43 A), 1wpg (2.3 A, 100.0%, 1.46 A), 2agv (2.4 A, 100.0%, 4.46 A), 2zbf (2.4 A, 100.0%, 2.60 A), 2zbd (2.4 A, 100.0%, 11.60 A), 1su4 (2.4 A, 100.0%, 13.40 A), 3fpb (2.5 A, 100.0%, 1.55 A), 3b9b (2.6 A, 100.0%, 3.81 A), 1vfp (2.9 A, 100.0%, 11.80 A), 2eat (2.9 A, 100.0%, 4.39 A),        |

|      |     |     |   |   |   |   |    |                                                                                                                                                                                                                                                                                                                                                                                                |
|------|-----|-----|---|---|---|---|----|------------------------------------------------------------------------------------------------------------------------------------------------------------------------------------------------------------------------------------------------------------------------------------------------------------------------------------------------------------------------------------------------|
| 2pkg | 3.3 | 3.3 | X |   |   |   | 4  | 1b3u (2.3 A, 100.0%, 6.24 A), 2ie4 (2.6 A, 100.0%, 5.59 A), 3fga (2.7 A, 99.8%, 2.83 A), 3dw8 (2.9 A, 100.0%, 2.05 A),                                                                                                                                                                                                                                                                         |
| 3s4u | 3.3 | 3.3 | X |   | X |   | 3  | 3p7i (1.7 A, 99.7%, 7.71 A), 3quj (2.2 A, 97.6%, 7.99 A), 3qk6 (2.4 A, 97.7%, 7.90 A),                                                                                                                                                                                                                                                                                                         |
| 1lwt | 3.2 | 3.2 | X |   |   |   | 3  | 1dfa (2.0 A, 98.0%, 3.80 A), 1jva (2.1 A, 97.5%, 1.31 A), 1ef0 (2.1 A, 97.8%, 2.44 A),                                                                                                                                                                                                                                                                                                         |
| 1lws | 3.5 | 3.5 | X |   |   |   | 3  | 1dfa (2.0 A, 98.0%, 3.80 A), 1jva (2.1 A, 97.5%, 1.30 A), 1ef0 (2.1 A, 97.8%, 2.77 A),                                                                                                                                                                                                                                                                                                         |
| 1u88 | 3.5 | 3.5 | X |   |   | X | 6  | 1dug (1.8 A, 99.5%, 0.69 A), 3crt (1.9 A, 99.0%, 0.76 A), 1m9a (2.1 A, 99.5%, 0.67 A), 4ecb (2.2 A, 99.5%, 1.47 A), 1gta (2.4 A, 99.5%, 0.68 A), 1b8x (2.7 A, 99.5%, 0.83 A),                                                                                                                                                                                                                  |
| 3ks2 | 3.3 | 3.3 | X |   |   |   | 2  | 3gz1 (2.1 A, 100.0%, 7.46 A), 3gyz (2.1 A, 100.0%, 5.61 A),                                                                                                                                                                                                                                                                                                                                    |
| 1a7b | 3.1 | 3.1 | X |   |   | X | 2  | 1cdc (2.0 A, 100.0%, 7.32 A), 1a64 (2.0 A, 100.0%, 0.76 A),                                                                                                                                                                                                                                                                                                                                    |
| 2dut | 3.0 | 3.0 | X |   |   |   | 3  | 2h4p (1.7 A, 100.0%, 6.97 A), 2h4q (2.1 A, 97.6%, 4.49 A), 2h4r (2.7 A, 100.0%, 1.17 A),                                                                                                                                                                                                                                                                                                       |
| 1l5t | 3.0 | 3.0 | X |   |   |   | 6  | 1h45 (1.9 A, 98.7%, 6.26 A), 1h44 (2.0 A, 99.4%, 6.01 A), 1dsn (2.0 A, 99.0%, 6.77 A), 1hse (2.2 A, 99.1%, 6.07 A), 1vfe (2.3 A, 99.4%, 6.31 A), 1vfd (2.5 A, 99.4%, 6.30 A),                                                                                                                                                                                                                  |
| 1jkt | 3.5 | 3.5 | X | X |   | X | 13 | 3bhy (1.2 A, 82.1%, 1.26 A), 2w4j (1.3 A, 100.0%, 1.44 A), 2a2a (1.5 A, 77.9%, 1.72 A), 3bqr (1.8 A, 81.7%, 6.39 A), 2xuu (1.8 A, 99.6%, 1.55 A), 2yab (1.9 A, 78.2%, 1.60 A), 2w4k (1.9 A, 100.0%, 1.56 A), 2j90 (2.0 A, 81.1%, 6.08 A), 2xzs (2.0 A, 100.0%, 1.68 A), 2x0g (2.2 A, 100.0%, 1.52 A), 1wvw (2.4 A, 100.0%, 1.49 A), 2y4p (2.6 A, 100.0%, 5.49 A), 1zws (2.9 A, 77.9%, 1.65 A), |
| 2atq | 3.2 | 3.2 | X |   |   | X | 5  | 3qex (1.7 A, 99.6%, 6.21 A), 3l8b (2.1 A, 100.0%, 3.27 A), 1ih7 (2.2 A, 99.8%, 2.73 A),                                                                                                                                                                                                                                                                                                        |

|      |     |     |   |   |   |   |    |                                                                                                                                                                                                                                                                      |
|------|-----|-----|---|---|---|---|----|----------------------------------------------------------------------------------------------------------------------------------------------------------------------------------------------------------------------------------------------------------------------|
|      |     |     |   |   |   |   |    | 2dtu (2.4 A, 99.9%, 3.13 A), 1clq (2.7 A, 99.8%, 2.32 A),                                                                                                                                                                                                            |
| 3vqk | 4.5 | 4.5 | X |   |   |   | 4  | 3aab (1.9 A, 98.1%, 4.28 A), 3vql (1.9 A, 100.0%, 1.69 A), 3aac (2.4 A, 98.1%, 7.16 A), 3vqm (2.5 A, 100.0%, 1.64 A),                                                                                                                                                |
| 3dpn | 3.3 | 3.2 | X |   |   | X | 3  | 3dor (2.2 A, 97.1%, 6.04 A), 3dpm (2.4 A, 96.7%, 6.42 A), 3dja (2.9 A, 95.8%, 6.40 A),                                                                                                                                                                               |
| 3e3j | 6.7 | 6.7 | X |   |   | X | 4  | 1msw (2.1 A, 99.9%, 16.00 A), 1qln (2.4 A, 99.9%, 6.34 A), 1aro (2.8 A, 99.6%, 6.16 A), 1h38 (2.9 A, 99.9%, 16.60 A),                                                                                                                                                |
| 2waf | 3.3 | 3.3 | X |   |   | X | 2  | 2wad (2.2 A, 91.1%, 6.22 A), 2wae (2.3 A, 90.9%, 6.21 A),                                                                                                                                                                                                            |
| 2hzv | 3.1 | 3.1 | X |   |   |   | 2  | 2hza (2.1 A, 100.0%, 5.64 A), 1q5v (2.3 A, 98.2%, 4.70 A),                                                                                                                                                                                                           |
| 3lco | 3.4 | 3.4 | X |   |   | X | 3  | 2i1m (1.8 A, 95.8%, 1.52 A), 3lcd (2.5 A, 99.3%, 3.65 A), 2ogv (2.7 A, 98.6%, 1.81 A),                                                                                                                                                                               |
| 3idq | 3.7 | 3.7 | X |   |   | X | 4  | 2woj (2.0 A, 100.0%, 2.62 A), 3zs9 (2.1 A, 100.0%, 2.54 A), 3h84 (2.3 A, 100.0%, 2.43 A), 3a36 (2.8 A, 99.6%, 2.37 A),                                                                                                                                               |
| 1gub | 3.1 | 3.0 | X |   | X |   | 2  | 1gud (1.7 A, 100.0%, 1.05 A), 1rpj (1.8 A, 100.0%, 3.95 A),                                                                                                                                                                                                          |
| 1t38 | 3.2 | 3.2 | X | X |   |   | 3  | 3l00 (1.7 A, 86.8%, 1.12 A), 1qnt (1.9 A, 99.3%, 0.76 A), 3kzy (1.9 A, 86.8%, 1.11 A),                                                                                                                                                                               |
| 3l8j | 3.0 | 3.0 | X |   | X |   | 2  | 3ajm (2.3 A, 100.0%, 3.77 A), 3l8i (2.5 A, 100.0%, 1.74 A),                                                                                                                                                                                                          |
| 1w8b | 3.0 | 2.8 | X |   |   |   | 6  | 2bz6 (1.6 A, 100.0%, 0.98 A), 2c4f (1.7 A, 100.0%, 1.02 A), 2flb (1.9 A, 100.0%, 1.25 A), 1jbu (2.0 A, 100.0%, 3.94 A), 1fak (2.1 A, 100.0%, 1.13 A), 1qfk (2.8 A, 100.0%, 1.19 A),                                                                                  |
| 3p39 | 3.1 | 3.1 | X | X |   | X | 14 | 3rvc (1.8 A, 92.4%, 0.78 A), 2rhk (1.9 A, 87.4%, 1.63 A), 3o9r (2.0 A, 92.4%, 0.73 A), 3m5r (2.0 A, 82.6%, 2.30 A), 2gx9 (2.1 A, 85.4%, 1.68 A), 3ee9 (2.1 A, 85.2%, 2.36 A), 3o9t (2.2 A, 82.8%, 1.72 A), 3kwg (2.2 A, 86.1%, 2.39 A), 3l4q (2.3 A, 90.0%, 3.18 A), |



|      |     |     |   |   |  |   |    |                                                                                                                                                                                                                                                                                                                                                                                                                          |
|------|-----|-----|---|---|--|---|----|--------------------------------------------------------------------------------------------------------------------------------------------------------------------------------------------------------------------------------------------------------------------------------------------------------------------------------------------------------------------------------------------------------------------------|
|      |     |     |   |   |  |   |    | 3p31 (2.5 A, 99.2%, 1.81 A), 3o9s (2.5 A, 90.9%, 1.81 A), 3o9q (2.5 A, 91.7%, 0.86 A), 3ee8 (2.6 A, 85.2%, 2.42 A), 3p38 (2.8 A, 100.0%, 0.32 A),                                                                                                                                                                                                                                                                        |
| 3o9u | 3.2 | 3.2 | X | X |  |   | 14 | 3rvc (1.8 A, 99.1%, 0.72 A), 2rhk (1.9 A, 89.7%, 1.70 A), 3o9r (2.0 A, 99.1%, 0.82 A), 3m5r (2.0 A, 87.1%, 1.81 A), 2gx9 (2.1 A, 95.7%, 0.72 A), 3ee9 (2.1 A, 89.7%, 1.73 A), 3o9t (2.2 A, 100.0%, 1.52 A), 3kww (2.2 A, 88.8%, 1.78 A), 3l4q (2.3 A, 100.0%, 1.89 A), 3p31 (2.5 A, 92.2%, 1.85 A), 3o9s (2.5 A, 100.0%, 1.37 A), 3o9q (2.5 A, 99.1%, 0.69 A), 3ee8 (2.6 A, 89.7%, 1.88 A), 3p38 (2.8 A, 91.4%, 0.92 A), |
| 1ob2 | 3.4 | 3.4 | X |   |  | X | 10 | 1efc (2.0 A, 100.0%, 11.20 A), 2hcj (2.1 A, 99.4%, 11.00 A), 3u6b (2.1 A, 99.7%, 10.80 A), 2bvn (2.3 A, 100.0%, 3.41 A), 1d8t (2.4 A, 99.7%, 11.20 A), 3u6k (2.5 A, 99.7%, 11.60 A), 1efu (2.5 A, 100.0%, 11.80 A), 1dg1 (2.5 A, 100.0%, 11.10 A), 3u2q (2.7 A, 99.7%, 11.80 A), 2hdn (2.8 A, 99.7%, 11.20 A),                                                                                                           |
| 2fx3 | 3.4 | 3.4 | X |   |  |   | 10 | 1efc (2.0 A, 99.7%, 1.21 A), 2hcj (2.1 A, 99.7%, 1.30 A), 3u6b (2.1 A, 100.0%, 1.30 A), 2bvn (2.3 A, 99.7%, 11.80 A), 1d8t (2.4 A, 100.0%, 1.25 A), 3u6k (2.5 A, 100.0%, 1.25 A), 1efu (2.5 A, 99.7%, 2.68 A), 1dg1 (2.5 A, 99.7%, 1.46 A), 3u2q (2.7 A, 100.0%, 1.09 A), 2hdn (2.8 A, 100.0%, 1.38 A),                                                                                                                  |
| 2cxf | 3.1 | 3.1 |   |   |  |   | 1  | 2dwk (2.0 A, 100.0%, 3.36 A),                                                                                                                                                                                                                                                                                                                                                                                            |
| 2cxl | 3.2 | 3.2 |   |   |  |   | 1  | 2dwk (2.0 A, 100.0%, 2.91 A),                                                                                                                                                                                                                                                                                                                                                                                            |
| 1juj | 3.0 | 3.0 | X |   |  |   | 12 | 3gh0 (1.6 A, 99.6%, 3.02 A), 4e5o (1.7 A, 93.4%, 2.85 A), 4eb4 (1.7 A, 93.4%, 0.52 A), 1hvy (1.9 A, 99.3%, 0.58 A), 3ihi (1.9 A, 93.2%, 0.71 A), 1hzw (2.0 A, 98.9%, 1.01 A), 3n5e (2.3 A, 98.5%, 2.41 A), 2rd8 (2.5 A,                                                                                                                                                                                                  |

|      |     |     |   |   |  |  |    |                                                                                                                                                                                                                                                                                                                                                                                                                                                                                                                                                                                                                                                                                                                                                                                                                                                                                                                                                                                                                                                                                                                                                                                                                                                                                                                                                                         |
|------|-----|-----|---|---|--|--|----|-------------------------------------------------------------------------------------------------------------------------------------------------------------------------------------------------------------------------------------------------------------------------------------------------------------------------------------------------------------------------------------------------------------------------------------------------------------------------------------------------------------------------------------------------------------------------------------------------------------------------------------------------------------------------------------------------------------------------------------------------------------------------------------------------------------------------------------------------------------------------------------------------------------------------------------------------------------------------------------------------------------------------------------------------------------------------------------------------------------------------------------------------------------------------------------------------------------------------------------------------------------------------------------------------------------------------------------------------------------------------|
|      |     |     |   |   |  |  |    | 99.3%, 1.27 A), 2tsr (2.6 A, 92.9%, 0.78 A), 3h9k (2.6 A, 99.3%, 1.10 A), 2rda (2.7 A, 99.3%, 1.45 A), 3gg5 (2.8 A, 99.6%, 1.05 A),                                                                                                                                                                                                                                                                                                                                                                                                                                                                                                                                                                                                                                                                                                                                                                                                                                                                                                                                                                                                                                                                                                                                                                                                                                     |
| 1fvf | 3.2 | 3.2 | X |   |  |  | 2  | 1epu (2.4 A, 96.5%, 3.05 A), 1fvh (2.8 A, 100.0%, 2.32 A),                                                                                                                                                                                                                                                                                                                                                                                                                                                                                                                                                                                                                                                                                                                                                                                                                                                                                                                                                                                                                                                                                                                                                                                                                                                                                                              |
| 1rfq | 3.0 | 3.0 | X | X |  |  | 49 | 2fxu (1.4 A, 99.7%, 0.97 A), 1wua (1.4 A, 99.7%, 0.88 A), 2v52 (1.4 A, 100.0%, 1.20 A), 1qz5 (1.4 A, 99.7%, 1.31 A), 3mn5 (1.5 A, 99.1%, 1.88 A), 2pbd (1.5 A, 99.7%, 1.34 A), 1j6z (1.5 A, 99.7%, 1.53 A), 3cip (1.6 A, 91.4%, 1.08 A), 2asm (1.6 A, 100.0%, 0.99 A), 1d4x (1.8 A, 93.9%, 1.11 A), 3sjh (1.8 A, 100.0%, 0.84 A), 2pav (1.8 A, 99.7%, 1.14 A), 2hf3 (1.8 A, 93.3%, 1.12 A), 2a40 (1.8 A, 99.7%, 1.19 A), 2a42 (1.9 A, 99.7%, 1.09 A), 2hmp (1.9 A, 99.7%, 1.34 A), 2gwj (1.9 A, 99.7%, 1.23 A), 1yag (1.9 A, 87.3%, 1.08 A), 1t44 (2.0 A, 100.0%, 1.22 A), 2gwk (2.0 A, 99.7%, 1.12 A), 3mn7 (2.0 A, 93.3%, 1.07 A), 3mn6 (2.0 A, 93.3%, 1.12 A), 3m6g (2.0 A, 100.0%, 0.95 A), 1esv (2.0 A, 99.7%, 1.06 A), 1c0g (2.0 A, 90.9%, 1.04 A), 3u8x (2.0 A, 100.0%, 1.02 A), 1yxq (2.0 A, 99.7%, 0.94 A), 3u9z (2.1 A, 100.0%, 1.38 A), 1kxp (2.1 A, 100.0%, 0.90 A), 1mdu (2.2 A, 99.7%, 1.18 A), 3ub5 (2.2 A, 94.2%, 1.60 A), 3chw (2.3 A, 91.4%, 1.07 A), 1rdw (2.3 A, 100.0%, 0.99 A), 2vyp (2.4 A, 100.0%, 1.11 A), 2v51 (2.4 A, 100.0%, 1.00 A), 1ma9 (2.4 A, 99.7%, 1.03 A), 4efh (2.5 A, 92.8%, 1.08 A), 2a5x (2.5 A, 100.0%, 0.85 A), 3el2 (2.5 A, 93.3%, 1.05 A), 2q97 (2.5 A, 99.7%, 1.04 A), 2q36 (2.5 A, 100.0%, 0.93 A), 2d1k (2.5 A, 99.7%, 1.21 A), 3daw (2.5 A, 100.0%, 1.63 A), 1p8z (2.6 A, 100.0%, 0.94 A), 2oan (2.6 A, 94.1%, 1.06 A), |

|      |     |     |   |  |   |   |   |                                                                                                                                                                                                                                           |
|------|-----|-----|---|--|---|---|---|-------------------------------------------------------------------------------------------------------------------------------------------------------------------------------------------------------------------------------------------|
|      |     |     |   |  |   |   |   | 2q1n (2.7 A, 100.0%, 0.99 A), 3ue5 (2.8 A, 100.0%, 1.10 A), 1atn (2.8 A, 99.7%, 1.31 A), 3buz (2.8 A, 100.0%, 1.01 A),                                                                                                                    |
| 3n6s | 3.1 | 3.1 | X |  | X |   | 2 | 3mva (2.2 A, 100.0%, 1.78 A), 3n7q (2.4 A, 100.0%, 3.05 A),                                                                                                                                                                               |
| 3oz0 | 3.0 | 3.0 | X |  |   | X | 6 | 2awh (2.0 A, 99.6%, 1.61 A), 3gz9 (2.0 A, 99.2%, 2.59 A), 2b50 (2.0 A, 99.6%, 2.34 A), 3sp9 (2.3 A, 100.0%, 2.82 A), 2xyj (2.3 A, 100.0%, 2.86 A), 2q5g (2.7 A, 100.0%, 1.74 A),                                                          |
| 3prj | 3.1 | 3.1 | X |  | X |   | 7 | 2q3e (2.0 A, 100.0%, 0.86 A), 2qg4 (2.1 A, 100.0%, 2.19 A), 3tf5 (2.3 A, 100.0%, 2.67 A), 3khu (2.3 A, 99.8%, 1.82 A), 3itk (2.4 A, 99.8%, 2.38 A), 3ptz (2.5 A, 100.0%, 0.31 A), 3tdk (2.8 A, 100.0%, 0.35 A),                           |
| 2qnc | 3.1 | 3.1 | X |  | X |   | 3 | 1e7l (1.3 A, 100.0%, 1.62 A), 1en7 (2.4 A, 99.4%, 2.23 A), 1e7d (2.8 A, 99.4%, 1.24 A),                                                                                                                                                   |
| 2qrn | 3.4 | 3.2 | X |  | X |   | 8 | 1p5z (1.6 A, 100.0%, 0.67 A), 2no7 (1.7 A, 98.7%, 0.78 A), 2zi6 (1.8 A, 99.1%, 1.22 A), 2zia (1.8 A, 98.6%, 0.71 A), 3qeo (1.9 A, 97.8%, 1.73 A), 2zi7 (2.0 A, 98.6%, 0.85 A), 3mjr (2.1 A, 98.7%, 1.56 A), 3ipy (2.5 A, 100.0%, 1.65 A), |
| 4dt0 | 3.6 | 3.6 | X |  |   |   | 2 | 2dm9 (1.9 A, 100.0%, 2.87 A), 2dma (2.0 A, 96.6%, 2.95 A),                                                                                                                                                                                |
| 1s60 | 3.0 | 3.0 | X |  |   |   | 2 | 2vbq (2.0 A, 100.0%, 0.60 A), 1s5k (2.4 A, 100.0%, 2.50 A),                                                                                                                                                                               |
| 2dpu | 3.1 | 3.1 | X |  |   | X | 3 | 1bm9 (2.0 A, 99.1%, 2.14 A), 2efw (2.5 A, 100.0%, 1.33 A), 1f4k (2.5 A, 100.0%, 0.74 A),                                                                                                                                                  |
| 3l1g | 3.3 | 3.3 | X |  |   | X | 3 | 2y1y (2.0 A, 98.7%, 1.49 A), 2y1z (2.5 A, 97.6%, 2.49 A), 2wj7 (2.6 A, 100.0%, 1.62 A),                                                                                                                                                   |
| 3id2 | 3.1 | 3.1 | X |  |   | X | 3 | 2zpm (1.0 A, 91.9%, 1.17 A), 3id4 (1.6 A, 97.8%, 1.81 A), 3id3 (2.0 A, 98.9%, 2.18 A),                                                                                                                                                    |
| 2r8a | 3.0 | 3.0 | X |  |   | X | 6 | 3pgu (1.7 A, 99.2%, 0.82 A), 3pgs (1.9 A, 99.2%, 0.91 A), 2r88 (2.6 A, 98.6%, 0.59 A),                                                                                                                                                    |

|      |     |     |   |   |   |   |    |                                                                                                                                                                                                                                          |
|------|-----|-----|---|---|---|---|----|------------------------------------------------------------------------------------------------------------------------------------------------------------------------------------------------------------------------------------------|
|      |     |     |   |   |   |   |    | 1t16 (2.6 A, 99.2%, 0.71 A), 1t1l (2.8 A, 99.2%, 0.90 A), 2r4p (2.9 A, 99.2%, 0.69 A),                                                                                                                                                   |
| 2r4n | 3.2 | 3.1 | X |   |   | X | 6  | 3pgu (1.7 A, 99.2%, 1.94 A), 3pgs (1.9 A, 99.3%, 0.83 A), 2r88 (2.6 A, 98.9%, 0.97 A), 1t16 (2.6 A, 99.5%, 0.59 A), 1t1l (2.8 A, 99.5%, 0.93 A), 2r4p (2.9 A, 99.5%, 0.57 A),                                                            |
| 2c86 | 3.0 | 3.0 | X |   |   |   | 2  | 2gec (1.3 A, 92.5%, 1.91 A), 2bxx (1.9 A, 100.0%, 1.19 A),                                                                                                                                                                               |
| 3km2 | 3.1 | 3.1 | X |   | X |   | 4  | 3pu7 (1.8 A, 100.0%, 0.36 A), 3hog (1.9 A, 100.0%, 2.28 A), 3km1 (2.0 A, 100.0%, 0.74 A), 1srd (2.0 A, 90.2%, 0.68 A),                                                                                                                   |
| 3hl9 | 3.4 | 3.4 | X |   |   |   | 2  | 3hld (2.0 A, 98.5%, 2.06 A), 3h1b (2.5 A, 100.0%, 0.47 A),                                                                                                                                                                               |
| 3cl9 | 3.3 | 3.3 | X |   |   | X | 4  | 3irm (2.1 A, 99.4%, 1.71 A), 3inv (2.4 A, 99.4%, 1.81 A), 2h2q (2.4 A, 100.0%, 1.50 A), 3kjs (2.5 A, 100.0%, 0.95 A),                                                                                                                    |
| 1i0e | 3.5 | 3.5 | X | X |   |   | 6  | 1qh4 (1.4 A, 81.6%, 1.41 A), 1u6r (1.6 A, 96.2%, 1.38 A), 3drb (2.0 A, 80.3%, 1.45 A), 1vrp (2.1 A, 83.9%, 1.44 A), 1g0w (2.3 A, 80.8%, 1.45 A), 2crk (2.4 A, 96.4%, 0.75 A),                                                            |
| 4a5t | 3.5 | 3.5 |   |   |   |   | 1  | 4dur (2.5 A, 100.0%, 1.93 A),                                                                                                                                                                                                            |
| 3auw | 3.6 | 3.6 | X |   |   | X | 2  | 3agw (2.2 A, 100.0%, 1.16 A), 2e4f (2.3 A, 100.0%, 1.31 A),                                                                                                                                                                              |
| 2akq | 3.0 | 3.0 | X | X |   |   | 8  | 1beb (1.8 A, 99.4%, 0.57 A), 3uev (1.9 A, 98.7%, 1.45 A), 1uz2 (1.9 A, 99.4%, 1.88 A), 3kza (2.0 A, 84.4%, 0.91 A), 1yup (2.1 A, 94.9%, 0.65 A), 3ph5 (2.4 A, 98.7%, 0.58 A), 2q39 (2.5 A, 100.0%, 1.30 A), 2r56 (2.8 A, 98.7%, 1.27 A), |
| 2bxs | 3.1 | 3.1 |   |   |   |   | 1  | 2z5y (2.2 A, 99.8%, 1.22 A),                                                                                                                                                                                                             |
| 2zgz | 3.0 | 3.0 | X | X |   | X | 12 | 2zgr (1.9 A, 99.4%, 0.94 A), 2zgl (1.9 A, 100.0%, 0.92 A), 2zgm (1.9 A, 100.0%, 0.90 A), 1ww7 (1.9 A, 88.6%, 1.59 A), 2zgz (1.9 A, 99.4%, 0.96 A), 3afk (1.9 A, 100.0%, 0.95 A), 3m3c (2.0 A, 100.0%, 0.93 A), 3m3o (2.1 A,              |

|      |     |     |   |  |   |   |                                                                                                                                                                                                                                                                            |
|------|-----|-----|---|--|---|---|----------------------------------------------------------------------------------------------------------------------------------------------------------------------------------------------------------------------------------------------------------------------------|
|      |     |     |   |  |   |   | 99.4%, 0.90 A), 3m3e (2.1 A, 99.4%, 0.94 A), 3m3q (2.2 A, 100.0%, 0.93 A), 1ww6 (2.2 A, 88.6%, 0.69 A), 2zgu (2.4 A, 99.4%, 1.34 A),                                                                                                                                       |
| 1xcp | 3.2 | 3.2 | X |  | X | 8 | 2afh (2.1 A, 99.7%, 0.98 A), 1fp6 (2.1 A, 99.7%, 1.16 A), 1g20 (2.2 A, 96.5%, 1.74 A), 2nip (2.2 A, 99.7%, 1.04 A), 1g1m (2.2 A, 99.7%, 1.03 A), 2afk (2.3 A, 99.6%, 1.73 A), 1m34 (2.3 A, 99.6%, 1.76 A), 1rw4 (2.5 A, 98.9%, 1.65 A),                                    |
| 1kog | 3.5 | 3.5 | X |  |   | 3 | 1evl (1.6 A, 100.0%, 0.57 A), 1fyf (1.6 A, 100.0%, 0.56 A), 1evk (2.0 A, 100.0%, 1.65 A),                                                                                                                                                                                  |
| 1u6b | 3.1 | 3.1 | X |  | X | 9 | 1nu4 (1.8 A, 100.0%, 1.64 A), 1urn (1.9 A, 100.0%, 0.88 A), 1m5o (2.2 A, 100.0%, 0.65 A), 3egz (2.2 A, 96.7%, 0.69 A), 1sj3 (2.2 A, 100.0%, 1.23 A), 3mxh (2.3 A, 100.0%, 0.93 A), 1oia (2.4 A, 97.8%, 1.30 A), 2nz4 (2.5 A, 100.0%, 0.66 A), 3cul (2.8 A, 95.7%, 0.74 A), |
| 3iwn | 3.2 | 3.2 | X |  | X | 9 | 1nu4 (1.8 A, 100.0%, 1.44 A), 1urn (1.9 A, 100.0%, 0.64 A), 1m5o (2.2 A, 100.0%, 0.65 A), 3egz (2.2 A, 96.7%, 0.62 A), 1sj3 (2.2 A, 100.0%, 0.59 A), 3mxh (2.3 A, 100.0%, 0.90 A), 1oia (2.4 A, 97.7%, 1.10 A), 2nz4 (2.5 A, 100.0%, 0.57 A), 3cul (2.8 A, 96.7%, 0.68 A), |
| 3p49 | 3.5 | 3.5 | X |  |   | 9 | 1nu4 (1.8 A, 100.0%, 1.85 A), 1urn (1.9 A, 100.0%, 0.88 A), 1m5o (2.2 A, 100.0%, 0.88 A), 3egz (2.2 A, 96.7%, 0.83 A), 1sj3 (2.2 A, 100.0%, 0.89 A), 3mxh (2.3 A, 100.0%, 0.76 A), 1oia (2.4 A, 97.7%, 1.23 A), 2nz4 (2.5 A, 100.0%, 0.87 A), 3cul (2.8 A, 95.7%, 0.91 A), |
| 2dr2 | 3.0 | 3.0 | X |  |   | 6 | 1r6u (2.0 A, 96.8%, 0.99 A), 1r6t (2.1 A, 96.5%, 0.95 A), 2qui (2.4 A, 100.0%, 0.85 A), 1o5t (2.5 A, 100.0%, 1.34 A), 2quk (2.8 A, 100.0%, 1.18 A), 2azx (2.8 A, 96.8%, 0.82 A),                                                                                           |

|      |     |     |   |   |   |   |    |                                                                                                                                                                                                                                                                                                                                    |
|------|-----|-----|---|---|---|---|----|------------------------------------------------------------------------------------------------------------------------------------------------------------------------------------------------------------------------------------------------------------------------------------------------------------------------------------|
| 1dcm | 3.0 | 2.6 | X |   |   | X | 2  | 1dbw (1.6 A, 100.0%, 1.35 A), 1d5w (2.3 A, 99.2%, 1.72 A),                                                                                                                                                                                                                                                                         |
| 2zni | 3.1 | 3.1 | X |   | X |   | 2  | 3dsq (2.1 A, 100.0%, 1.50 A), 2znpj (2.5 A, 100.0%, 1.59 A),                                                                                                                                                                                                                                                                       |
| 3fbr | 3.5 | 3.5 | X |   | X |   | 4  | 3dnu (1.5 A, 97.8%, 1.13 A), 3dnt (1.7 A, 97.6%, 0.80 A), 2wiu (2.4 A, 99.8%, 1.55 A), 3dntv (2.7 A, 99.5%, 1.10 A),                                                                                                                                                                                                               |
| 2zys | 3.1 | 3.1 | X |   | X |   | 2  | 2zyr (1.8 A, 100.0%, 0.63 A), 2zyh (1.8 A, 99.8%, 1.51 A),                                                                                                                                                                                                                                                                         |
| 1gc4 | 3.3 | 3.3 | X |   |   |   | 4  | 1b5p (1.8 A, 99.5%, 1.20 A), 5bj3 (2.2 A, 100.0%, 0.71 A), 1gck (2.5 A, 99.5%, 1.16 A), 1bkg (2.6 A, 99.0%, 0.58 A),                                                                                                                                                                                                               |
| 1gc3 | 3.3 | 3.3 | X |   | X |   | 4  | 1b5p (1.8 A, 99.5%, 1.02 A), 5bj3 (2.2 A, 100.0%, 0.62 A), 1gck (2.5 A, 99.5%, 1.01 A), 1bkg (2.6 A, 99.0%, 0.69 A),                                                                                                                                                                                                               |
| 2zo2 | 3.1 | 3.1 | X | X |   | X | 11 | 3fde (1.4 A, 100.0%, 1.44 A), 2zkd (1.6 A, 98.9%, 1.23 A), 3bi7 (1.7 A, 86.5%, 0.78 A), 2zkg (1.8 A, 98.9%, 0.62 A), 2pb7 (1.9 A, 87.0%, 1.05 A), 2zo1 (2.0 A, 100.0%, 1.26 A), 3f8j (2.0 A, 99.0%, 1.24 A), 2zo0 (2.2 A, 100.0%, 1.32 A), 3clz (2.2 A, 87.7%, 1.36 A), 3f8i (2.3 A, 100.0%, 1.19 A), 2zkg (2.5 A, 98.9%, 1.23 A), |
| 4dx0 | 3.4 | 3.4 | X | X |   | X | 6  | 2br9 (1.8 A, 72.6%, 1.36 A), 1o9d (2.3 A, 87.2%, 1.02 A), 3axy (2.4 A, 89.5%, 1.34 A), 3e6y (2.5 A, 87.2%, 1.11 A), 3m50 (2.6 A, 89.0%, 0.56 A), 2o98 (2.7 A, 87.3%, 1.06 A),                                                                                                                                                      |
| 2x0n | 3.2 | 3.2 | X | X |   |   | 4  | 3ids (1.8 A, 90.2%, 1.37 A), 1i32 (2.6 A, 80.7%, 1.22 A), 1a7k (2.8 A, 80.7%, 1.23 A), 1gyp (2.8 A, 80.7%, 1.24 A),                                                                                                                                                                                                                |
| 1fb5 | 3.5 | 3.5 | X |   |   | X | 2  | 1oth (1.9 A, 98.1%, 1.36 A), 1fvo (2.6 A, 98.1%, 1.25 A),                                                                                                                                                                                                                                                                          |
| 2xrg | 3.2 | 3.2 | X |   | X |   | 2  | 3nkq (1.7 A, 98.3%, 1.05 A), 2xr9 (2.0 A, 99.9%, 1.18 A),                                                                                                                                                                                                                                                                          |

|      |     |     |   |   |   |   |   |                                                                                                                                                                                                             |
|------|-----|-----|---|---|---|---|---|-------------------------------------------------------------------------------------------------------------------------------------------------------------------------------------------------------------|
| 1de9 | 3.0 | 3.0 | X |   |   | X | 7 | 2o3h (1.9 A, 99.3%, 0.65 A), 1hd7 (1.9 A, 99.6%, 0.57 A), 3u8u (2.1 A, 99.6%, 0.98 A), 1bix (2.2 A, 99.6%, 0.51 A), 1e9n (2.2 A, 99.6%, 0.73 A), 1dew (2.6 A, 100.0%, 0.66 A), 2isi (2.8 A, 99.6%, 0.85 A), |
| 3uvf | 3.0 | 3.0 | X | X |   | X | 2 | 2qoj (2.4 A, 84.6%, 1.03 A), 3eh8 (2.7 A, 85.4%, 0.75 A),                                                                                                                                                   |
| 2fpf | 3.0 | 3.0 | X |   | X |   | 2 | 2fpe (1.8 A, 96.7%, 0.56 A), 2fpd (2.0 A, 96.7%, 0.50 A),                                                                                                                                                   |
| 1u9o | 3.3 | 3.3 | X |   |   | X | 2 | 3q0w (1.6 A, 100.0%, 1.01 A), 3q0v (1.9 A, 100.0%, 0.83 A),                                                                                                                                                 |
| 1xqg | 3.1 | 3.1 |   |   |   |   | 1 | 1wz9 (2.1 A, 97.2%, 1.01 A),                                                                                                                                                                                |
| 2xz0 | 3.0 | 3.0 | X | X |   |   | 3 | 2uw1 (1.9 A, 82.0%, 0.64 A), 1oq4 (2.4 A, 100.0%, 0.89 A), 1oq9 (2.4 A, 100.0%, 0.74 A),                                                                                                                    |
| 1nph | 3.0 | 3.0 |   |   |   |   | 1 | 2fh1 (1.6 A, 94.2%, 0.90 A),                                                                                                                                                                                |
| 2wrf | 3.1 | 3.1 | X |   |   |   | 3 | 2wr1 (2.1 A, 93.6%, 1.04 A), 2wr7 (2.5 A, 94.7%, 0.89 A), 2wr4 (2.5 A, 93.0%, 0.93 A),                                                                                                                      |
| 2nre | 4.0 | 3.5 |   |   |   |   | 1 | 1dj0 (1.5 A, 100.0%, 1.11 A),                                                                                                                                                                               |
| 1uaz | 3.4 | 3.4 | X | X | X |   | 3 | 2ei4 (2.1 A, 85.0%, 0.70 A), 2z55 (2.5 A, 85.0%, 0.74 A), 1vgo (2.5 A, 86.1%, 0.72 A),                                                                                                                      |
| 3i78 | 3.0 | 3.0 | X | X |   | X | 5 | 3beu (1.1 A, 98.7%, 0.75 A), 1os8 (1.6 A, 90.1%, 0.86 A), 2fmj (1.6 A, 92.3%, 0.85 A), 1sgt (1.7 A, 88.7%, 0.88 A), 3i77 (2.1 A, 96.1%, 0.90 A),                                                            |
| 2ahd | 3.0 | 3.0 | X |   |   |   | 2 | 1s3l (2.4 A, 100.0%, 0.85 A), 1s3n (2.5 A, 100.0%, 0.36 A),                                                                                                                                                 |
| 1jod | 3.2 | 3.0 | X |   | X |   | 2 | 1f35 (2.3 A, 100.0%, 0.77 A), 1job (2.4 A, 96.9%, 0.89 A),                                                                                                                                                  |
| 3i5s | 3.0 | 3.0 | X |   |   |   | 2 | 3i5r (1.7 A, 100.0%, 0.80 A), 1pht (2.0 A, 100.0%, 0.55 A),                                                                                                                                                 |
| 3fdf | 3.2 | 3.2 | X |   | X |   | 2 | 3p9y (2.1 A, 93.2%, 0.79 A), 3omx (2.3 A, 94.2%, 0.85 A),                                                                                                                                                   |
| 3fmv | 3.3 | 3.3 | X |   |   |   | 2 | 3p9y (2.1 A, 93.2%, 0.62 A), 3omx (2.3 A, 94.2%, 0.82 A),                                                                                                                                                   |

|      |     |     |   |   |   |   |   |                                                                                                                                                                                                                                                                         |
|------|-----|-----|---|---|---|---|---|-------------------------------------------------------------------------------------------------------------------------------------------------------------------------------------------------------------------------------------------------------------------------|
| 3n5u | 3.2 | 3.2 | X |   | X |   | 6 | 3e7a (1.6 A, 100.0%, 0.51 A), 3egg (1.9 A, 100.0%, 0.52 A), 1jk7 (1.9 A, 98.0%, 0.70 A), 1it6 (2.0 A, 98.0%, 0.53 A), 2o8g (2.5 A, 97.6%, 0.48 A), 1s70 (2.7 A, 92.9%, 0.60 A),                                                                                         |
| 2v9z | 3.0 | 3.0 | X |   |   |   | 3 | 3g9x (0.9 A, 96.9%, 0.66 A), 3fbw (1.2 A, 97.3%, 0.77 A), 1bn7 (1.5 A, 96.9%, 0.72 A),                                                                                                                                                                                  |
| 4ddf | 3.1 | 3.1 | X | X | X |   | 3 | 3n79 (1.5 A, 95.1%, 0.59 A), 3pac (1.9 A, 88.0%, 0.75 A), 3vcd (2.4 A, 100.0%, 0.41 A),                                                                                                                                                                                 |
| 3b1k | 3.3 | 3.3 | X |   |   | X | 2 | 3b1j (2.2 A, 100.0%, 0.67 A), 3b20 (2.4 A, 100.0%, 0.86 A),                                                                                                                                                                                                             |
| 2ayg | 3.1 | 3.1 | X |   |   |   | 2 | 1r8h (1.9 A, 100.0%, 0.73 A), 2aye (2.3 A, 100.0%, 0.67 A),                                                                                                                                                                                                             |
| 2ayb | 3.2 | 3.2 | X |   |   | X | 2 | 1r8h (1.9 A, 100.0%, 0.69 A), 2aye (2.3 A, 100.0%, 0.69 A),                                                                                                                                                                                                             |
| 3red | 3.0 | 3.0 | X | X | X |   | 2 | 1ju2 (1.5 A, 86.7%, 0.50 A), 3gdp (1.6 A, 86.7%, 0.44 A),                                                                                                                                                                                                               |
| 3g1k | 3.1 | 3.1 | X |   |   |   | 9 | 3g91 (1.2 A, 99.6%, 0.54 A), 3g00 (1.7 A, 99.6%, 0.55 A), 3ga6 (1.9 A, 99.6%, 0.55 A), 3fzi (1.9 A, 100.0%, 0.58 A), 3g2d (2.3 A, 99.6%, 0.53 A), 3g2c (2.3 A, 100.0%, 0.61 A), 3g8v (2.4 A, 99.6%, 0.55 A), 3g0r (2.4 A, 99.6%, 0.55 A), 3g4t (2.6 A, 100.0%, 0.53 A), |
| 1wac | 3.0 | 2.9 | X |   |   | X | 2 | 1uvj (1.9 A, 99.7%, 0.52 A), 1hi8 (2.5 A, 95.9%, 0.60 A),                                                                                                                                                                                                               |
| 2g3k | 3.0 | 3.0 | X |   |   |   | 2 | 2j9v (2.0 A, 98.9%, 0.50 A), 2j9u (2.0 A, 98.9%, 0.40 A),                                                                                                                                                                                                               |
| 4dfs | 3.8 | 3.8 | X |   | X |   | 3 | 3azy (1.6 A, 99.2%, 0.55 A), 3azx (1.8 A, 99.2%, 0.48 A), 3azz (1.8 A, 99.2%, 0.54 A),                                                                                                                                                                                  |
| 2bvg | 3.2 | 3.2 | X |   | X |   | 2 | 2bvf (1.9 A, 100.0%, 0.52 A), 2bvh (2.9 A, 100.0%, 0.48 A),                                                                                                                                                                                                             |
| 2abm | 3.2 | 3.2 | X |   |   |   | 2 | 2o9g (1.9 A, 98.7%, 0.43 A), 2o9d (2.3 A, 98.7%, 0.42 A),                                                                                                                                                                                                               |
